# Supplementary material for: Comprehensive identification of genomic and environmental determinants of phenotypic plasticity in maize
Source: HighWire-hosted journal article supplement (doi:10.1101/gr.279027.124), 2024-08-01
Supplement: Supplemental_Material.pdf [file Supplemental_Material.pdf]

# Comprehensive Identification of Genomic and Environmental Determinants of Phenotypic Plasticity in Maize

Laura E. Tibbs-Cortes<sup>1,2,3</sup>, Tingting Guo<sup>4,5</sup>, Carson M. Andorf<sup>3,6</sup>, Xianran Li<sup>2,\*</sup>, Jianming Yu<sup>1,\*</sup>

## Supplemental Materials

### Table of Contents:

Supplemental Methods

Supplemental Figures

- Fig. S1: Principal Components Analysis (PCA) of environmental means reflect environmental indices identified by CERIS.
- Fig. S2: Pattern detection for phenotypic plasticity of days to anthesis (DTA) in the maize NAM population.
- Fig. S3: Environmental variables.
- Fig. S4: CERIS-chosen environmental indices are robust to training set.
- Fig. S5: Overall prediction accuracy for all traits.
- Fig. S6: Within-environment prediction accuracy for all traits.
- Fig. S7: Prediction accuracy by number of environments.
- Fig. S8: CERIS reaction norms for all traits.
- Fig. S9: *P* values of markers from intercept and slope GWAS.
- Fig. S10: Number of candidate genes by trait for all examined window sizes.
- Fig. S11: BRIDGEcereal visualization of major haplotypes for DTA intercept candidate genes and associated phenotype estimates among the NAM founders.

- Fig. S12: BRIDGEcereal visualization of major haplotypes for DTA slope candidate genes and associated phenotype estimates among the NAM founders.
- Fig. S13: BRIDGEcereal visualization of major haplotypes for *cct1*, the candidate gene identified for both DTA slope and intercept, and associated phenotype estimates among the NAM founders.
- Fig. S14: Study environments map.
- Fig. S15: Relationship between heritability and degree of plasticity.
- Fig. S16: Prediction accuracy for Anthesis-Silking Interval (ASI) with and without moisture variables.

#### Supplemental Tables

- Table S1: List of traits.
- Table S2: CERIS-chosen environmental indices.
- Table S3: Significant markers. (Note: Table S3 is attached as “Supplemental\_Table\_S3.csv”)
- Table S4: Candidate genes. (Note: Table S4 is attached as “Supplemental\_Table\_S4.csv”)
- Table S5: Enriched GO terms.
- Table S6: Within-environment heritability.

#### Supplemental Code Files

- Supplemental Code File 1: Code used in this manuscript. (Note: attached as Supplemental\_Code\_File\_1.R)

## Supplemental Methods

### Assessment of Impacts of Environment Number on Accuracy of CERIS

Recent work systematically evaluated the number of environments needed to accurately estimate and predict slope and intercept with empirical data from two crops (Guo et al. 2024). These results showed that it is not only the number of environments observed but also the range of the environmental mean that they cover that contributes to the accuracy of reaction norm parameter estimates (Guo et al. 2024). From sampling subsets of a total of 9 environments, a plateau in accuracy was consistently observed in both intercept and slope estimates in both crops when the subset included at least 4 environments and/or covered an environmental mean range at least 25-50% of the minimum environmental mean observed (Guo et al. 2024). As few as two environments could provide good estimates, as long as they covered a wide environmental gradient.

To check for impacts of number of observed environments on prediction accuracies, we examined the correlation between these and found a significant positive correlation (Fig. S7A:  $r = 0.47$ ,  $P < 0.001$ ). However, those traits regarded as important and requiring less additional work beyond the field observations were measured in more environments (e.g.,  $n=11$  environments for flowering traits DTA and DTS, considered less complex to predict) than were yield traits that require harvesting and processing for measurements (e.g.,  $n=5$  environments for yield traits T20KW and KN, considered more complex to predict) (Table S1) (Onogi 2022; Li et al. 2021). To differentiate the relative importance of trait type and environment number to the overall trend, we checked the correlation within trait type, and found that correlations decreased notably (Fig. S7B,  $r = 0.26-0.30$ ,  $P < 0.001$ ), indicating that much of the overall trend came from the connection of trait type (and prediction complexity) with observation number.

The range of measured environment number was 5-11 for all traits and an environmental mean range of at least 25% of the minimum environmental mean was observed for all but 4 traits (ERN, CD, LL, and T20KW), indicating that our data likely reached the plateau found by (Guo et al. 2024) based on the number of environments and therefore should provide accurate estimates of slope and intercept,

though of course there may be room for further improvement, particularly for the traits for which a lower environmental range was covered.

### **Construction of Candidate Gene List**

The full candidate gene list (Table S4) was constructed by building on previous work in the NAM panel that defined candidate genes as those within a 20kb window centered on each significant marker from GWAS (Kusmec et al. 2017). Each significant marker has segregating (bi-allelic) variants in the NAM and was found to be associated with trait variation using GWAS. In general, choosing an appropriate window for candidate gene identification is always a challenging topic and a subject of future research. Therefore, we checked 13 different window sizes (4kb, 10kb, 20kb, 30kb, 40kb, 60kb, 80kb, 100kb, 150kb, 200kb, and 250kb) to confirm consistency of general patterns (Fig. S10). The chosen 20kb window corresponds to an average LD ( $r^2$ ) of 0.16 in our data, which is within the typical  $r^2$  range of 0.1 – 0.2 for delineating candidate regions (Vos et al. 2017). To enable readers to investigate other windows, we also made all significant SNPs available in Table S3 as well as at MaizeGDB.

The candidate gene list was based on the current B73 genome assembly (Zm-B73-REFERENCE-NAM-5.0) for several reasons. First, in the maize NAM population, approximately 50% of the genetic material of a given RIL originates from B73 and the other 50% from another NAM parent. In the population as a whole, therefore, 50% of the genetic material originates from B73, while only ~1.9% originates from each of the other parents (Yu et al. 2008), providing substantially less confidence in any inferences about non-core candidate genes sourced from other (non-B73) NAM parents vs. those found in B73. In addition, the recent re-sequencing of the NAM founders, which generated the high-density SNP and SV marker data utilized here, mapped all markers to the B73 genome (Hufford et al. 2021). It was cleaner to keep the annotations consistent with the genomic coordinates used to identify these SNPs and SVs. Finally, because by definition core genes are present in all annotations, our method did not exclude any core genes. Therefore, we focused on B73 genes in our investigation. In doing so, we also follow



established precedent for GWAS in this population (Hufford et al. 2021) and for other cases with pan-genomes available (Della Coletta et al. 2021).

Based on the >20 million SNP and SV markers used for GWAS, 94% of the candidate genes identified had at least one SNP or SV marker within the gene itself, increasing to >99% when the search was broadened to include 5kb upstream. Among the remaining genes, manual examination revealed non-marker polymorphisms; for example, Zm00001eb036690 had no markers within it, but BRIDGEcereal identified large indels within this gene among the NAM founders. Because of the presence of non-marker polymorphisms as well as our goal to provide a community resource with all significant results available for ongoing investigation, we chose to retain the remaining <1% of genes from our candidate gene list.

## **BRIDGEcereal Haplotype Visualization**

BRIDGEcereal (<https://bridgecereal.scinet.usda.gov/>) (Zhang et al. 2023) was used to manually identify indel-based haplotypes among the NAM parents for a subset of the candidate genes (“selected” candidate genes) in the example trait DTA (Fig. S11, Fig. S12, Fig. S13). For each gene, the 26 parents were grouped into two or three “genotype groups,” representing different BRIDGEcereal-detected haplotypes based on large indels, which were then named after a representative parent in that group. The phenotype estimates for each NAM parent within a given genotype group were also plotted (Fig. S11, Fig. S12, Fig. S13).

## **Supplemental Methods Sources**

Della Coletta R, Qiu Y, Ou S, Hufford MB, Hirsch CN. 2021. How the pan-genome is changing crop genomics and improvement. *Genome Biol* **22**: 3.

Guo T, Wei J, Li X, Yu J. 2024. Environmental context of phenotypic plasticity in flowering time in sorghum and rice. *J Exp Bot* **75**: 1004–1015.

Hufford MB, Seetharam AS, Woodhouse MR, Chougule KM, Ou S, Liu J, Ricci WA, Guo T,

- Olson A, Qiu Y, et al. 2021. De novo assembly, annotation, and comparative analysis of 26 diverse maize genomes. *Science* **373**: 655–662.
- Kusmec A, Srinivasan S, Nettleton D, Schnable PS. 2017. Distinct genetic architectures for phenotype means and plasticities in *Zea mays*. *Nat Plants* **3**: 715–723.
- Li X, Guo T, Wang J, Bekele WA, Sukumaran S, Vanous AE, McNellie JP, Tibbs-Cortes L, Lopes MS, Lamkey KR, et al. 2021. An integrated framework reinstating the environmental dimension for GWAS and genomic selection in crops. *Mol Plant* **14**: 874–887.
- Onogi A. 2022. Integration of Crop Growth Models and Genomic Prediction Genomic predictions (GP). In *Genomic Prediction of Complex Traits: Methods and Protocols* (eds. N. Ahmadi and J. Bartholomé), pp. 359–396, Springer US, New York, NY.
- Vos PG, Paulo MJ, Voorrips RE, Visser RGF, van Eck HJ, van Eeuwijk FA. 2017. Evaluation of LD decay and various LD-decay estimators in simulated and SNP-array data of tetraploid potato. *TAG Theor Appl Genet Theor Angew Genet* **130**: 123–135.
- Yu J, Holland JB, McMullen MD, Buckler ES. 2008. Genetic Design and Statistical Power of Nested Association Mapping in Maize. *Genetics* **178**: 539–551.
- Zhang B, Huang H, Tibbs-Cortes LE, Vanous A, Zhang Z, Sanguinet K, Garland-Campbell KA, Yu J, Li X. 2023. Streamline unsupervised machine learning to survey and graph indel-based haplotypes from pan-genomes. *Mol Plant* **16**: 975–978.

139

## Supplemental Figures

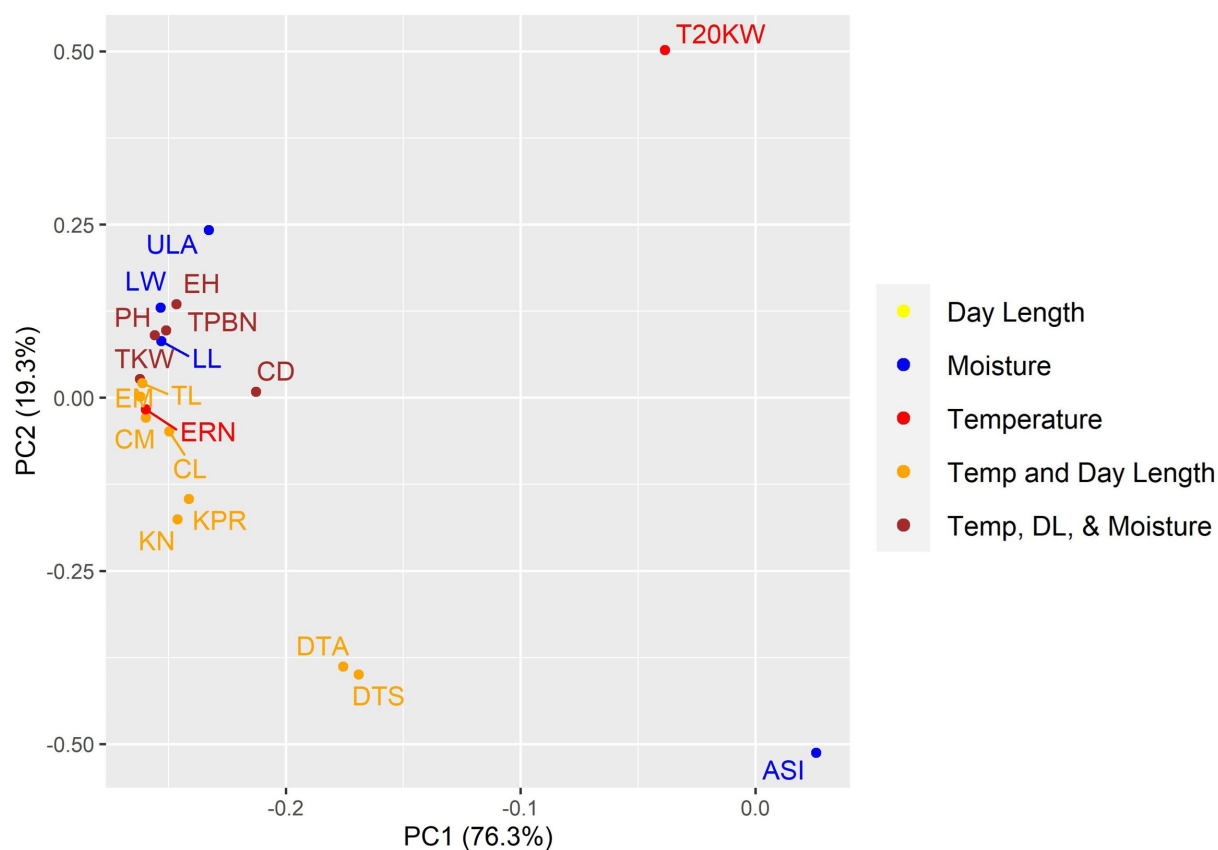

140

141 Fig. S1: Principal Components Analysis (PCA) of environmental means reflect environmental  
 142 indices identified by CERIS. Principal Components (PCs) were calculated based on the scaled  
 143 and centered environmental mean for each trait; percent of variance explained by each PC is  
 144 shown on axes. Traits are colored by the environmental variable(s) chosen for them by CERIS.  
 145 Abbreviations: temperature (temp) and day length (DL).

146

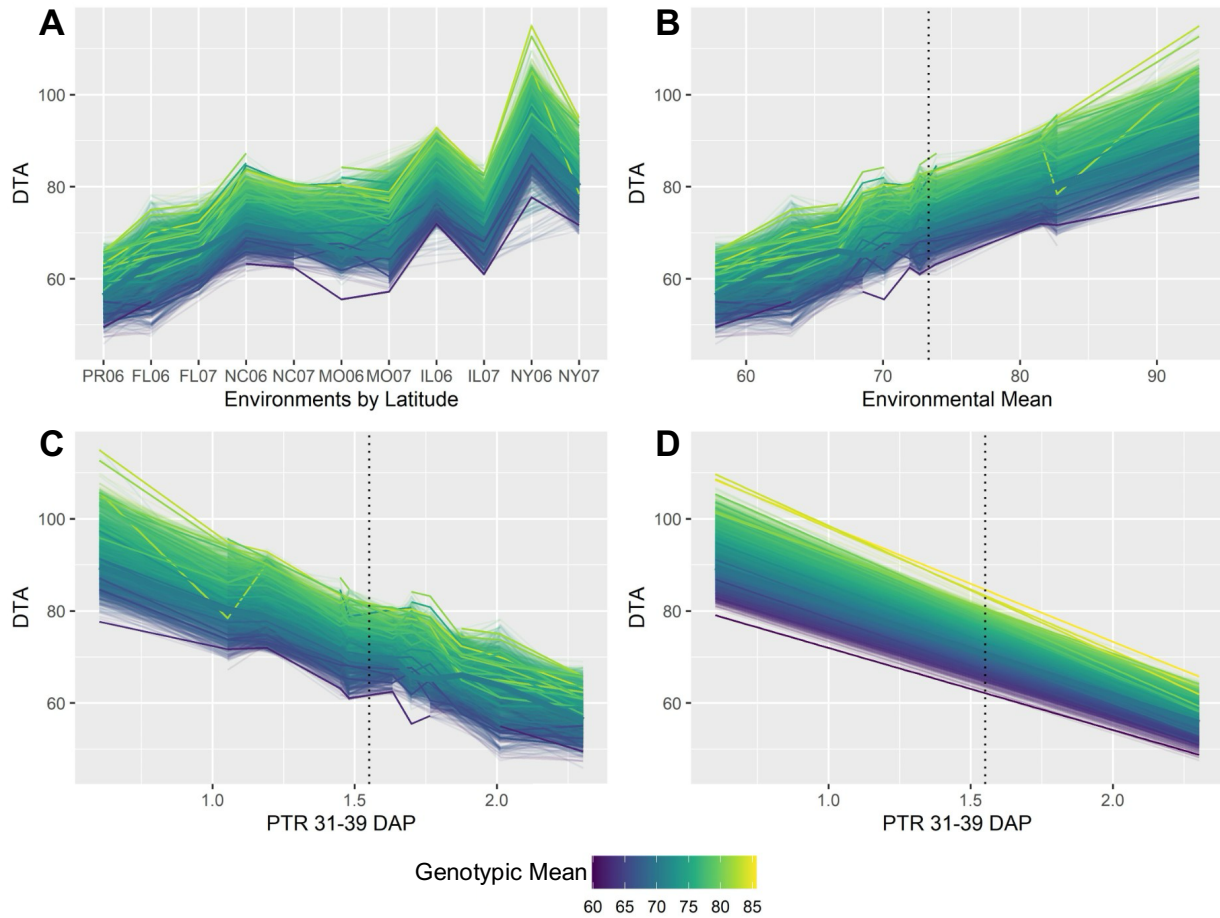

Fig. S2: Pattern detection for phenotypic plasticity of days to anthesis (DTA) in the maize NAM population. (A) DTA across environments ordered by latitude. Environments are named as the two-letter state abbreviation with the last two digits of the year (e.g., MO06 is Missouri 2006). (B) DTA across environmental mean values. (C) DTA across values of the CERIS-selected environmental index (PTR 31-39 DAP). (D) Linear reaction norm of DTA across the environmental index values, calculated using random regression as used in CERIS-JGRA predictions. In all panels, lines connect DTA values of a given genotype across environments; line color indicates genotypic mean. The thick line denotes the common parent B73, and other opaque lines denote other NAM parents.

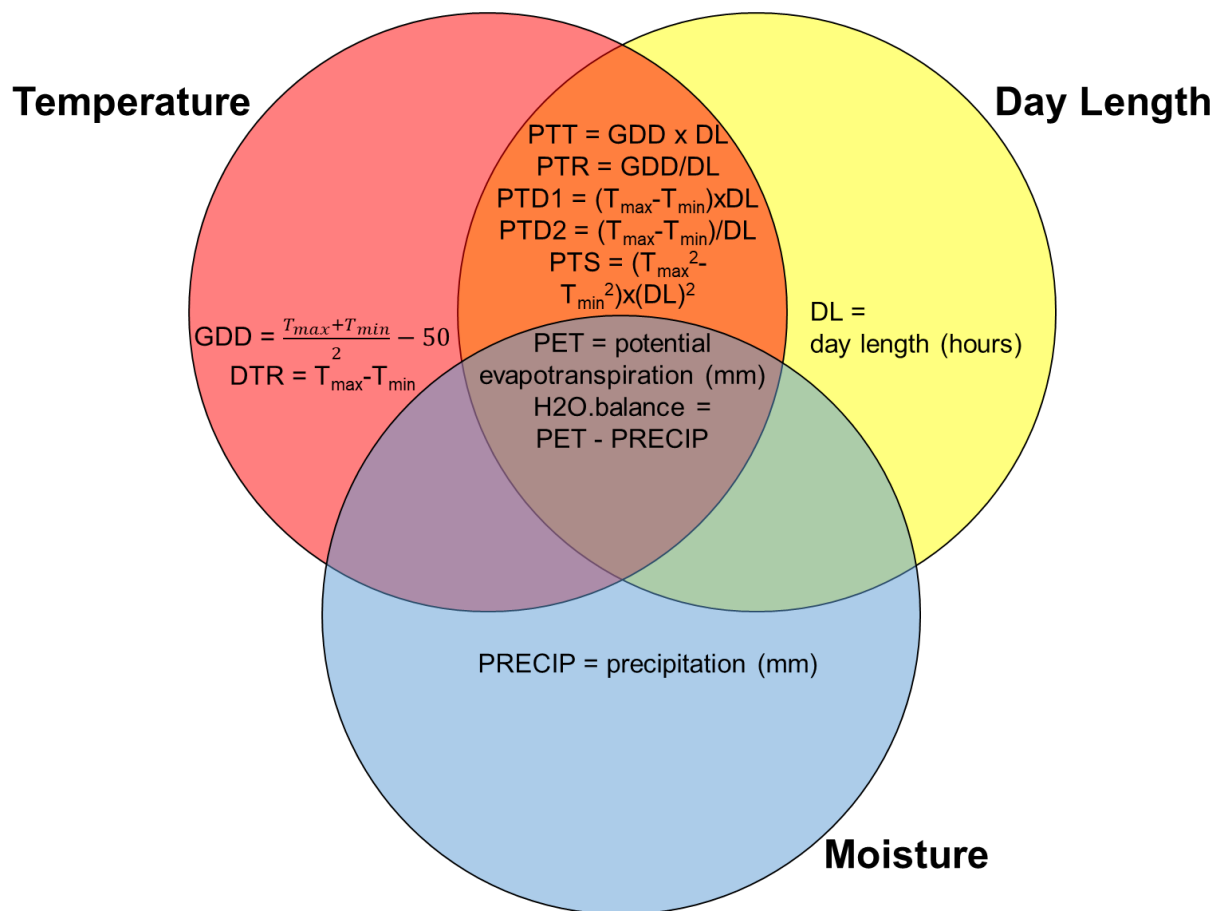

159

160 Fig. S3: Environmental variables. The environmental variables searched by CERIS include

161 measures of temperature, day length, moisture, and combinations of these.

162

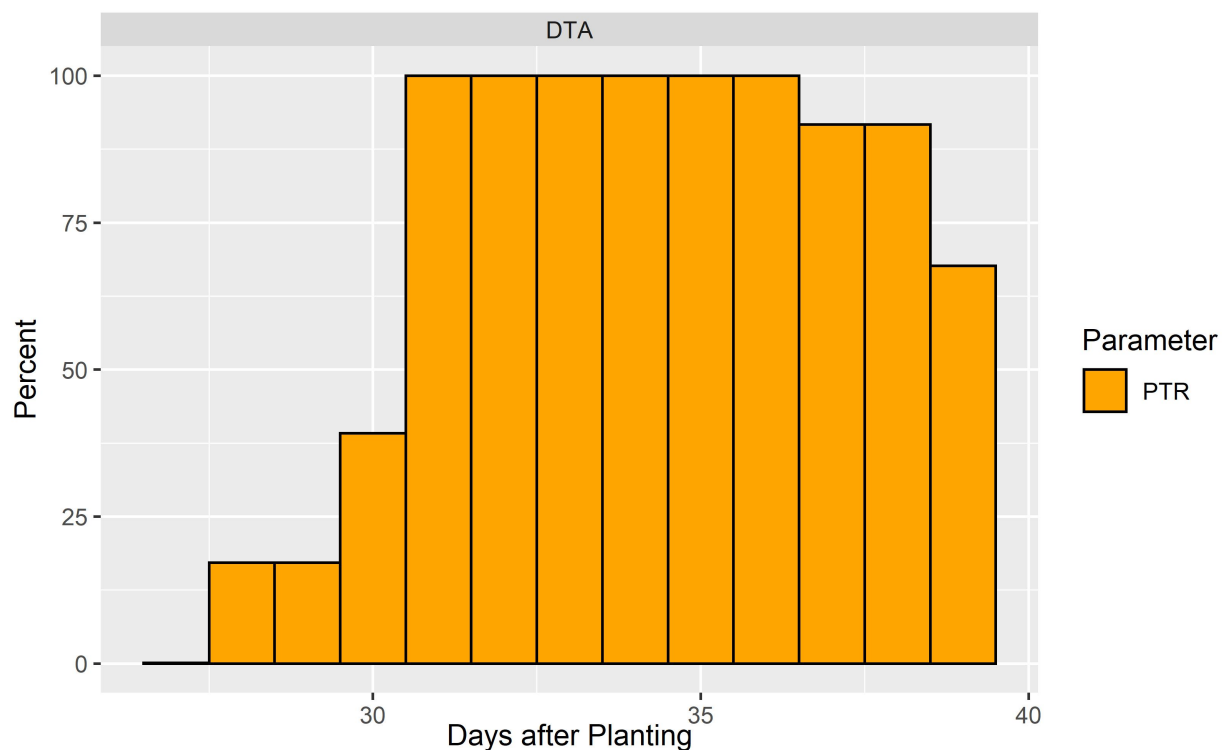

Fig. S4: CERIS-chosen environmental indices are robust to training set. For the example trait DTA, CERIS was conducted on more than 700 different training sets (see Methods). This histogram shows how often a given day after planting was included in the CERIS-chosen environmental index; color indicates the chosen parameter. 100% of training sets yielded environmental indices using the environmental variable PTR and including the time range of 31-36 days after planting.

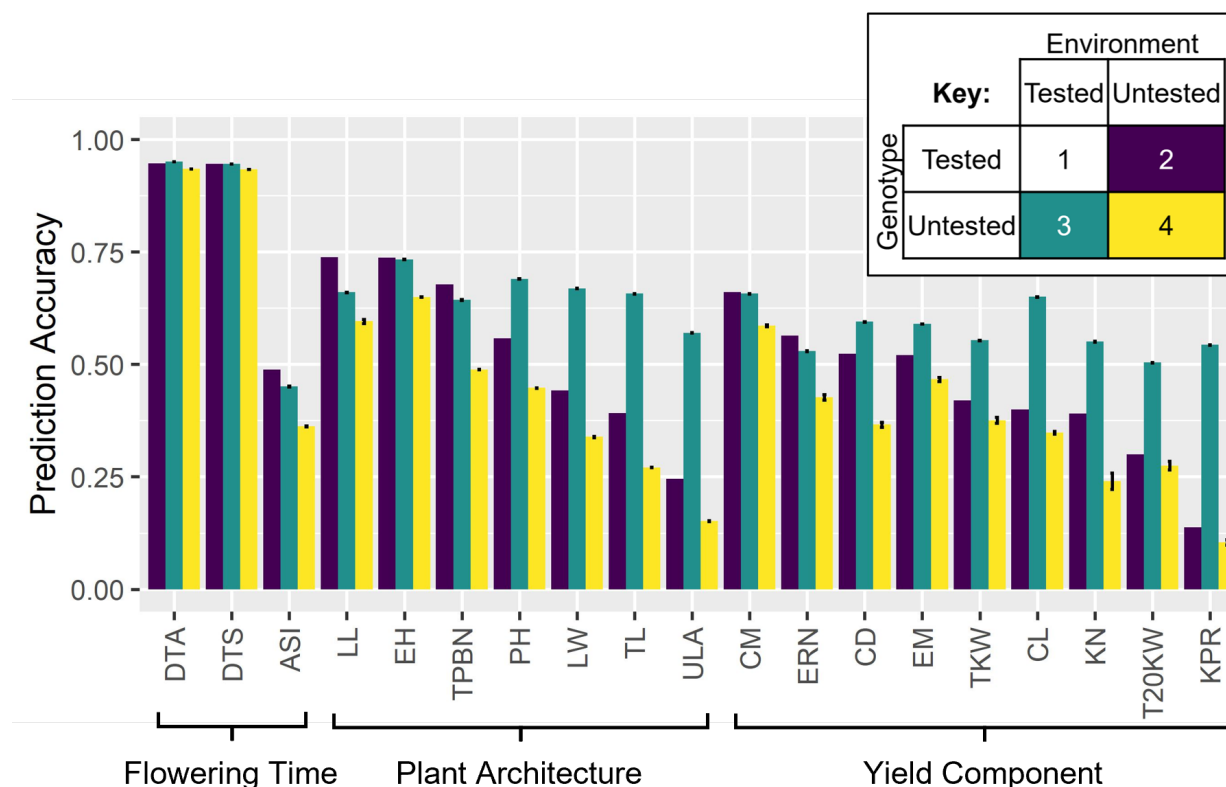

172

173 Fig. S5: Prediction accuracy for all traits, overall across all environments. Prediction accuracy  
 174 for 1 to 2 (purple), 1 to 3 (green), and 1 to 4 (yellow) prediction scenarios for flowering time,  
 175 plant architecture, and yield component traits. Key (inset) shows naming scheme for prediction  
 176 scenarios; left and right columns denote tested and untested genotypes, respectively, while the  
 177 top and bottom rows denote tested and untested genotypes. Error bars show standard error of  
 178 prediction accuracy from 30 replicates. Traits ordered by prediction accuracy in the 1 to 2  
 179 scenario within each trait group.

180

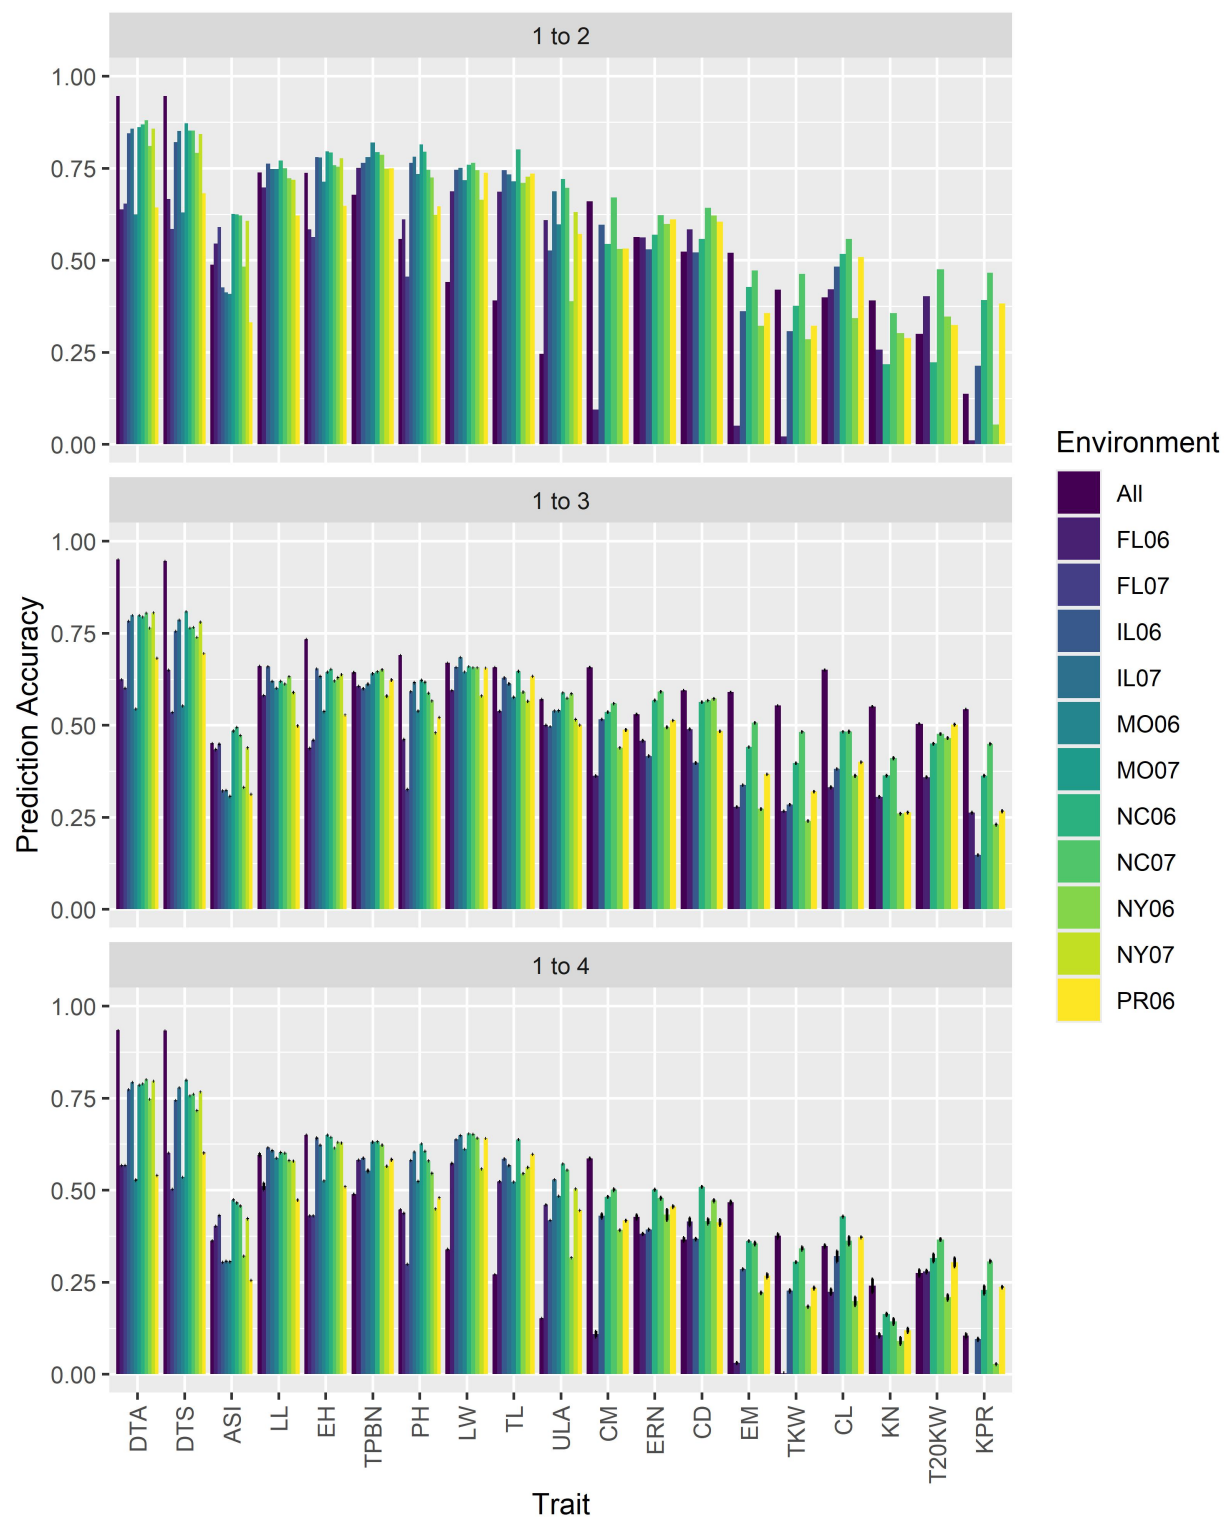



183 Fig. S6: Prediction accuracy for all traits, shown both within and across environments. Prediction  
184 accuracy for 1 to 2, 1 to 3, and 1 to 4 prediction scenarios for all traits across environments  
185 (“All”) as well as within each measured environment. Error bars show standard error of  
186 prediction accuracy from 30 replicates. Trait order corresponds to Fig. S5.  
187

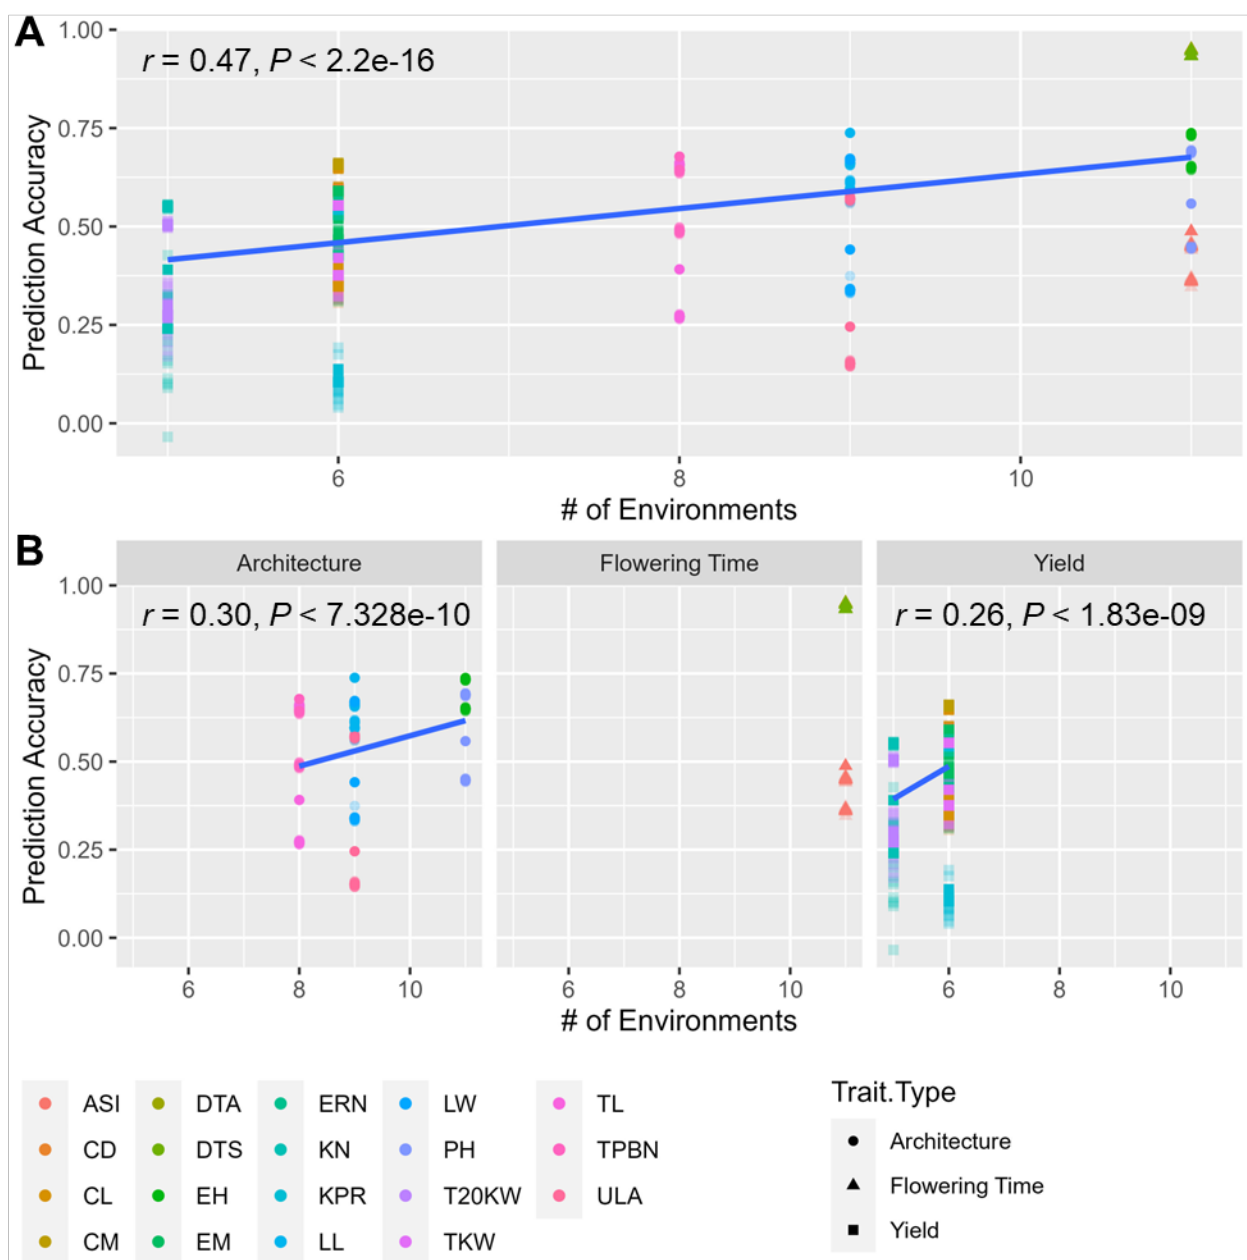

Fig. S7: Prediction accuracy by number of environments in which each trait was measured. (A) Significant positive correlation found considering all traits together. (B) This correlation decreases when considered separately by trait type.

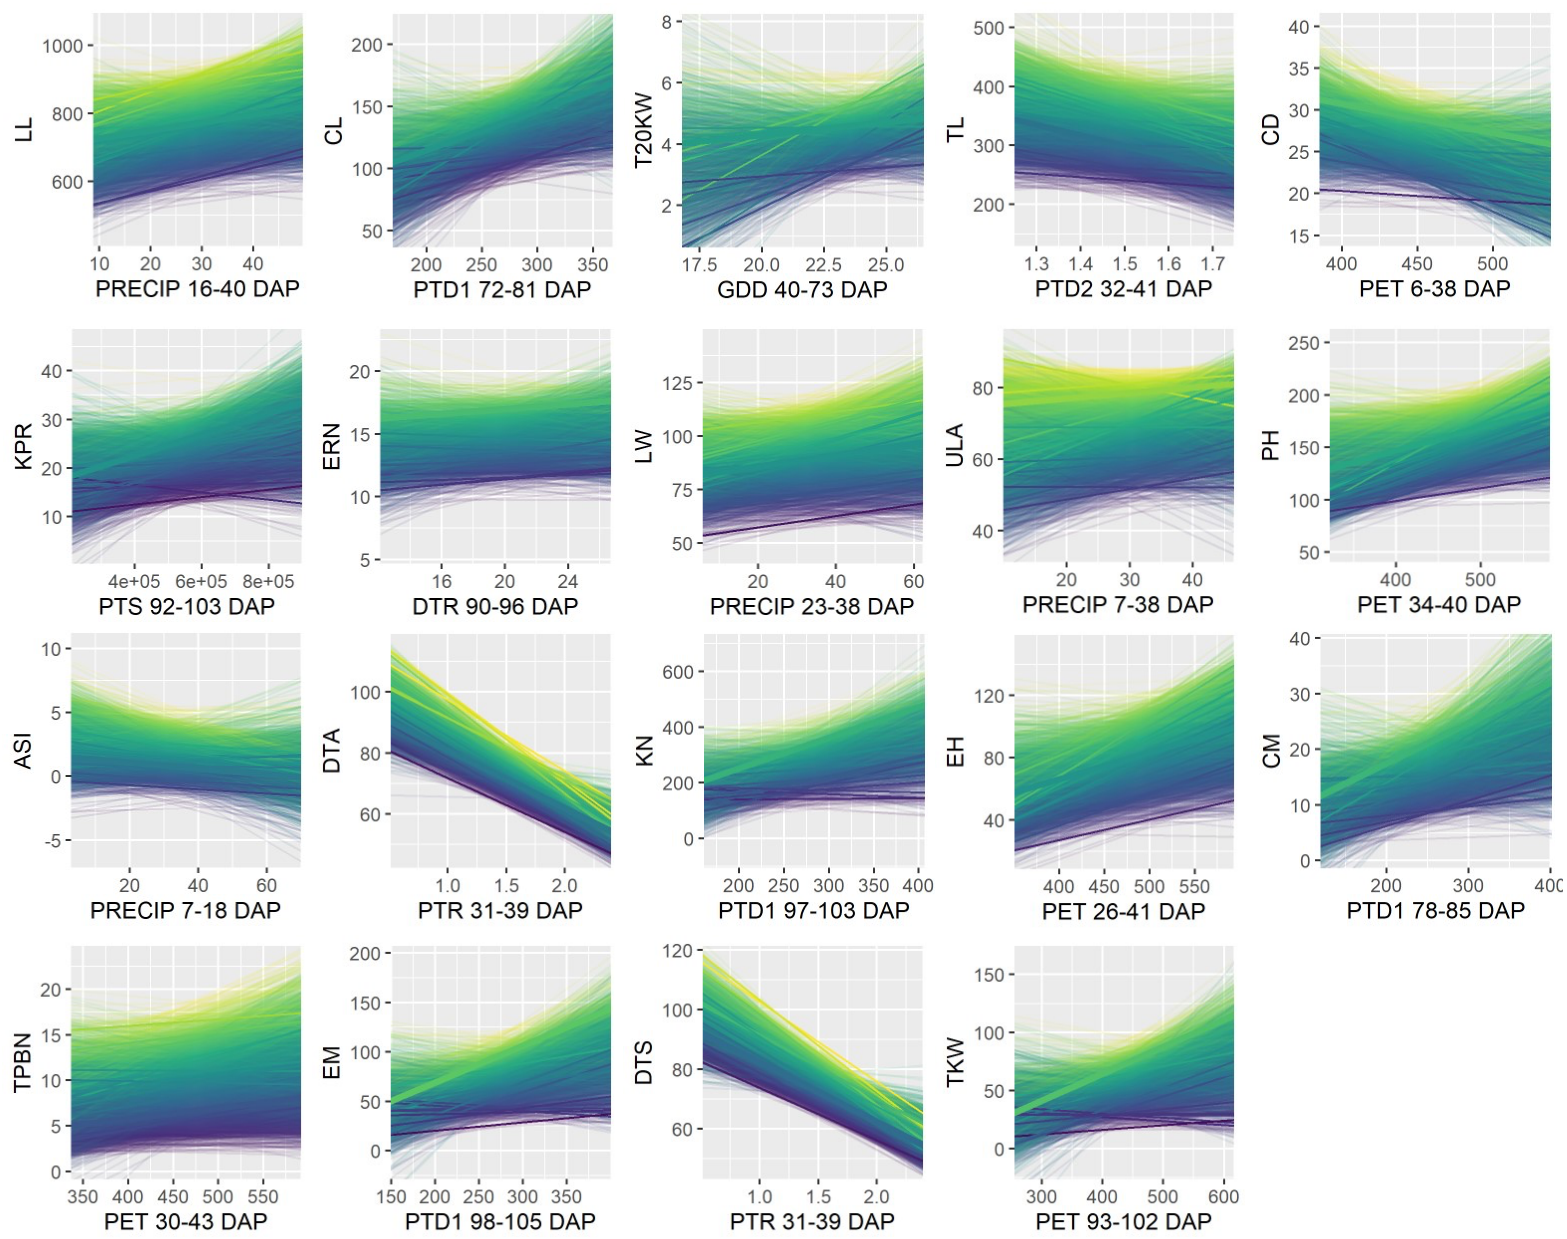

195 Fig. S8: CERIS reaction norms for all traits. In all panels, the thick line denotes the common parent B73 and opaque lines the other  
196 parents; line color indicates the genotypic mean, ranked within a given trait. Slope and intercept estimates from these reaction norms  
197 using fixed regression were used as input phenotypes in GWAS. Traits are ordered by the correlation between  $-\log_{10}(P)$  values from  
198 slope and intercept GWAS to show the continuum of genetic architectures of plasticity.

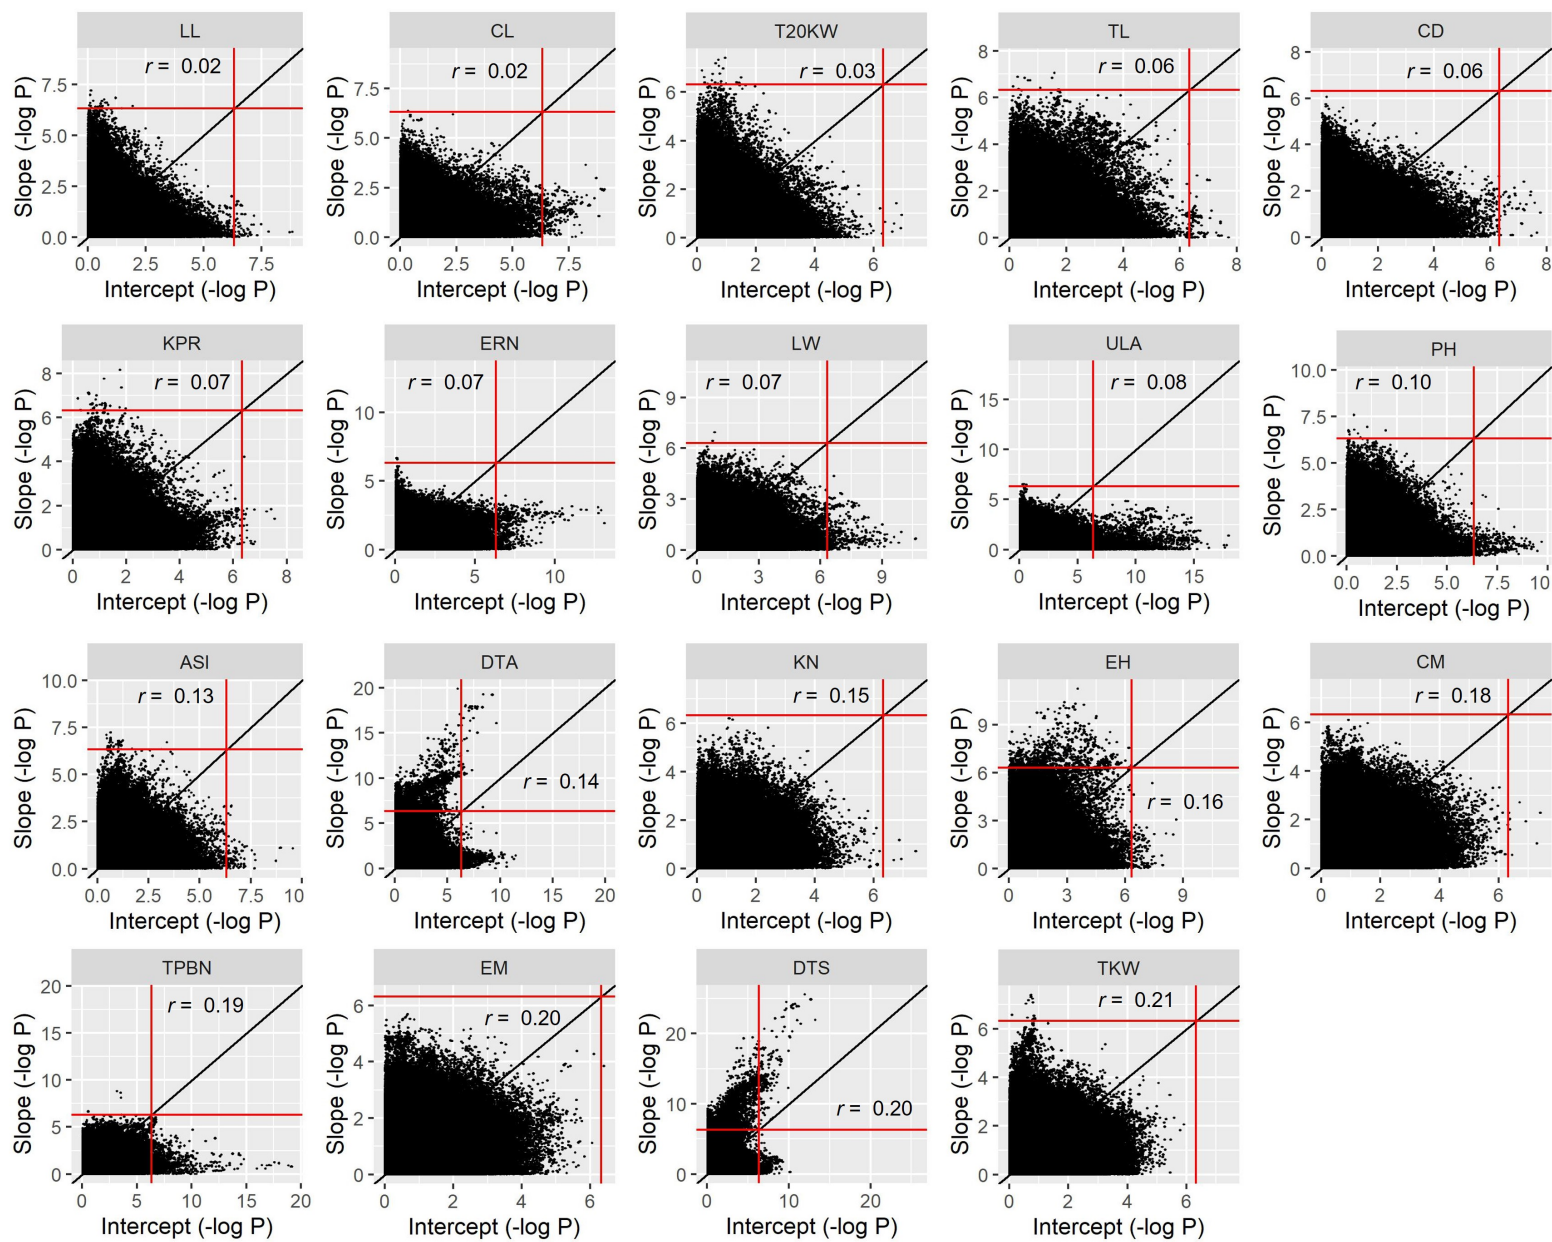

200 Fig. S9:  $P$  values of markers from intercept and slope GWAS. For each trait, the  $-\log_{10}(P)$  values from slope and intercept GWAS are  
201 shown on the y and x axis, respectively. In all cases, these  $-\log_{10}(P)$  values were significantly ( $P < 0.00001$ ) positively correlated. Red  
202 lines show the SimpleM significance threshold, and the black line indicates the line where  $x = y$ . Traits ordered by the correlation  
203 between  $-\log_{10}(P)$  values from slope and intercept GWAS to show the continuum of genetic architectures of plasticity

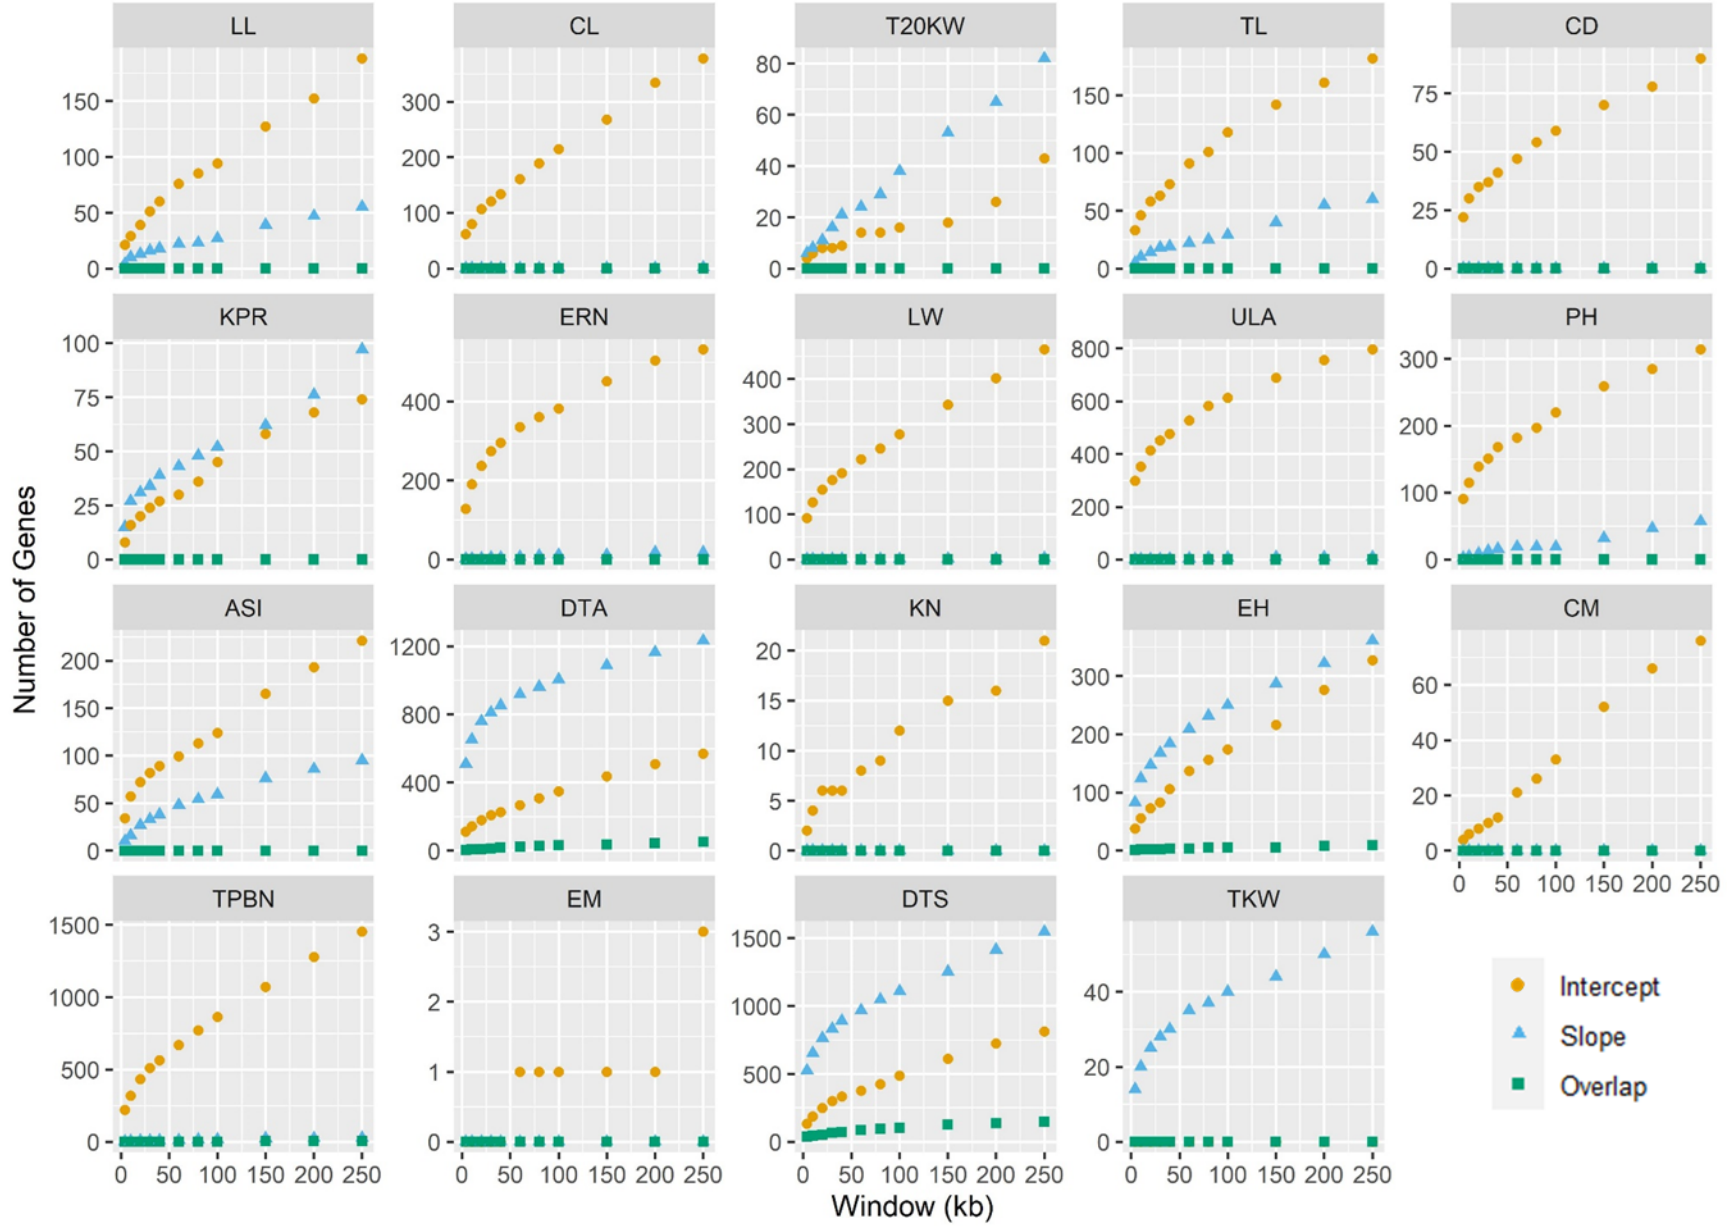

205 Fig. S10: Number of candidate genes by trait for all examined window sizes. Number of genes (y axis) located within a given window  
206 (x axis) of significant markers detected in intercept (orange circles) or slope (blue triangles) GWAS as well as those detected in both  
207 (“overlap”, green squares). Traits ordered by the correlation between  $-\log_{10}(P)$  values from slope and intercept GWAS to show the  
208 continuum of genetic architectures of plasticity.

209



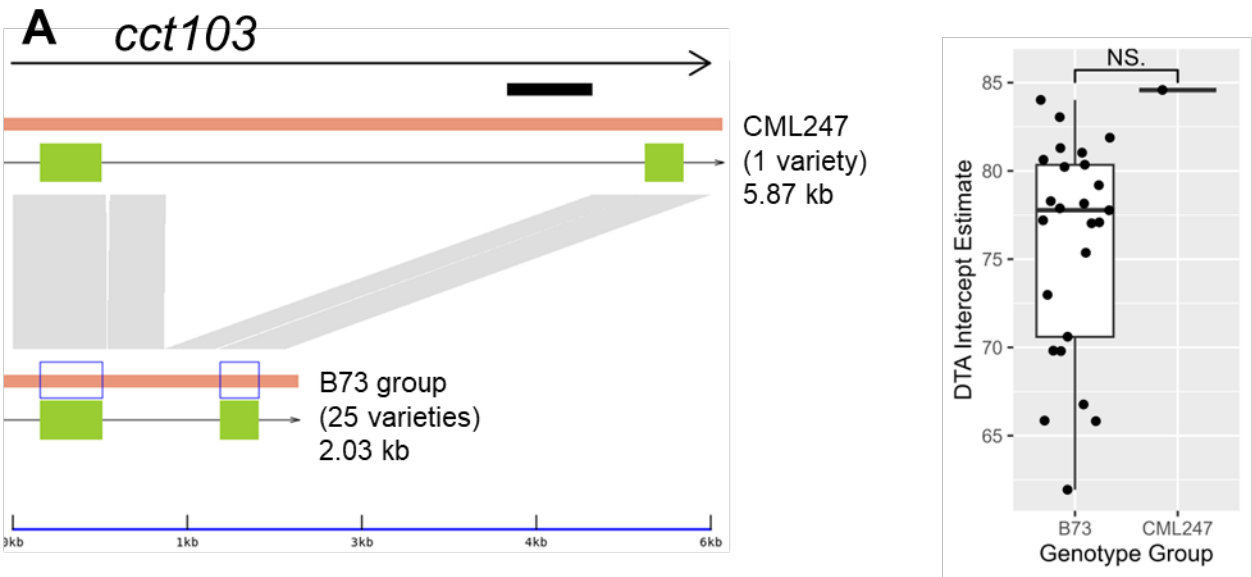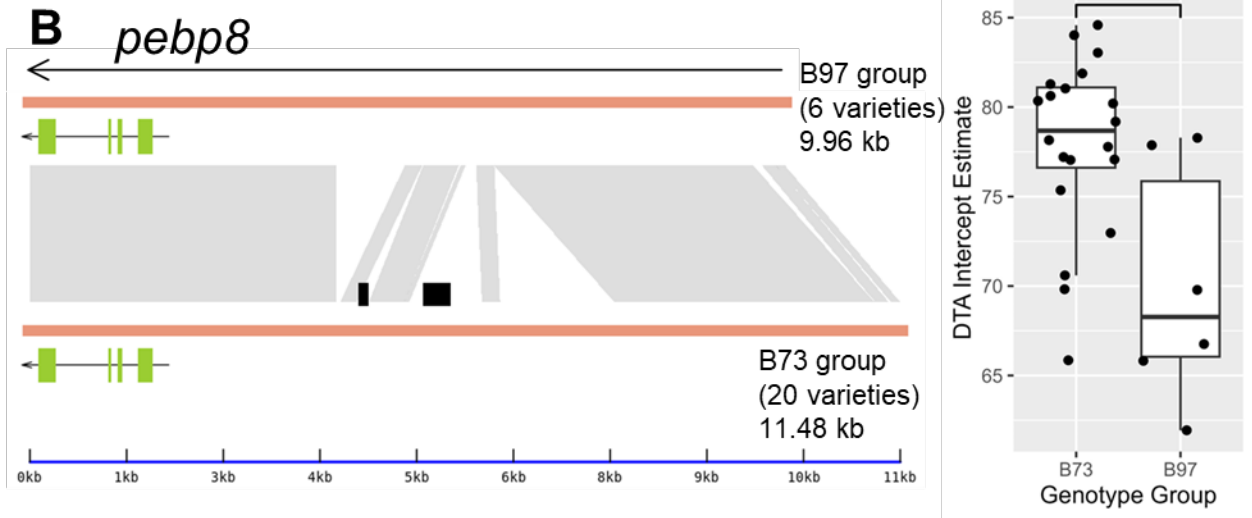

212 Fig. S11: BRIDGEcereal visualization of major haplotypes for DTA intercept candidate genes  
213 and associated phenotype estimates among the NAM founders. (A) CML247 has both the highest  
214 DTA intercept estimate among the NAM founders and a unique haplotype at *cct103*,  
215 distinguished by an insertion in the intron. The CML247 genotype group contains only CML247;  
216 the B73 group contains the other 25 founders: B73, B97, CML103, CML228, CML277,  
217 CML322, CML333, CML52, CML69, HP301, Il14H, Ki11, Ki3, Ky21, M162W, M37W,  
218 Mo18W, MS71, NC350, NC358, Oh43, Oh7B, P39, Tx303, and Tzi8. (B) Polymorphisms  
219 upstream of *pebp8* correspond to a significant difference in DTA intercept (B97 group contains  
220 B97, Il14H, MS71, Oh7B, P39, and Tx303; B73 group contains B73, CML103, CML228,  
221 CML247, CML277, CML322, CML333, CML52, CML69, HP301, Ki11, Ki3, Ky21, M162W,  
222 M37W, Mo18W, NC350, NC358, Oh43, and Tzi8).

223

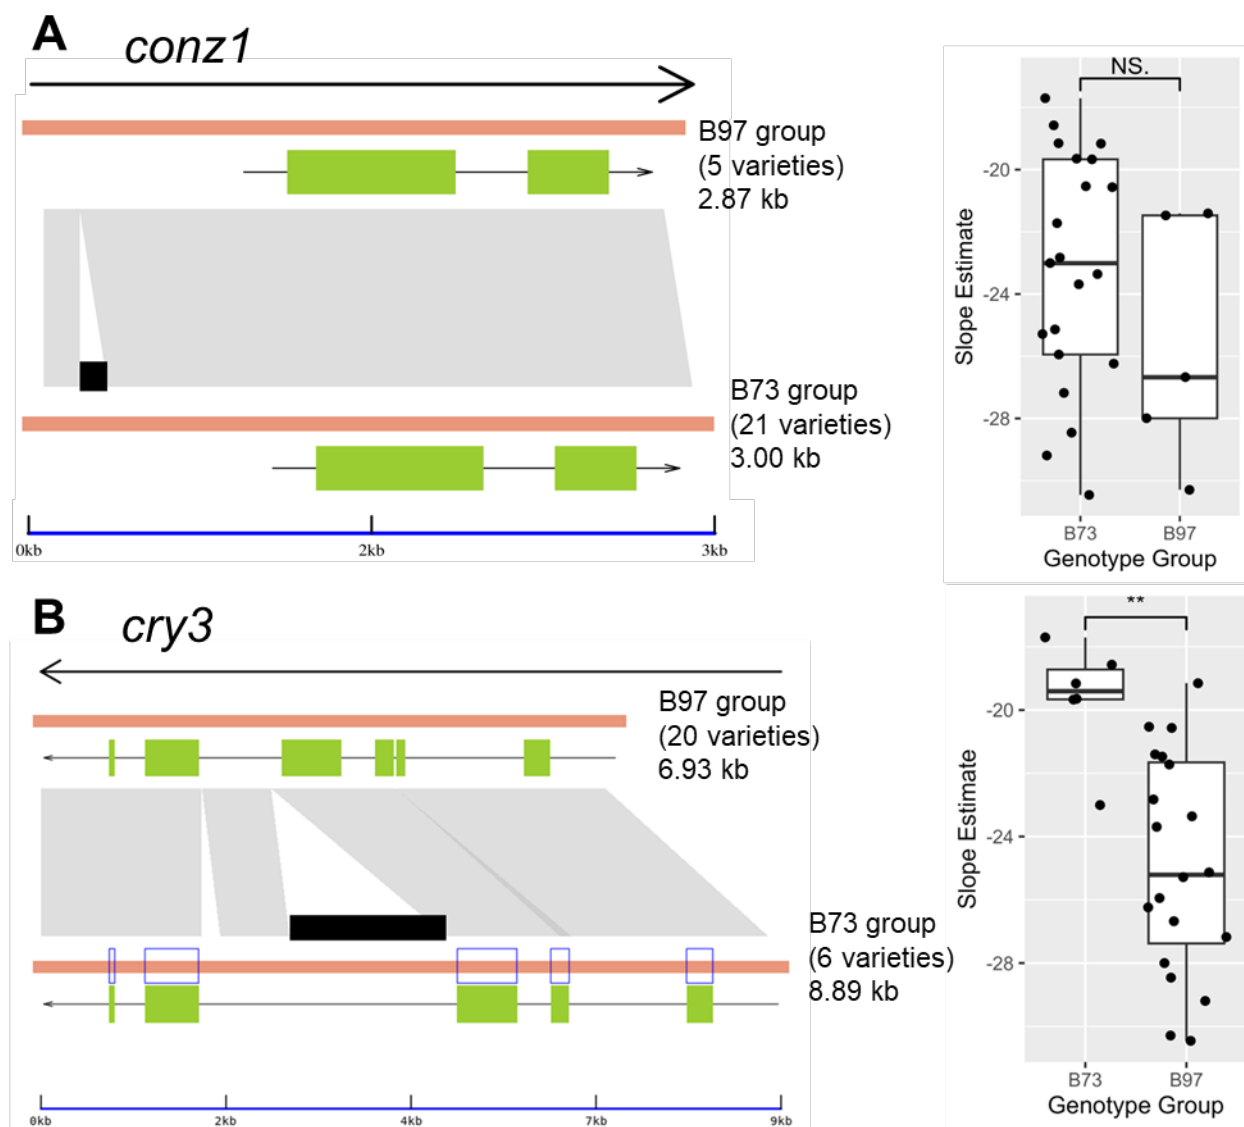

Fig. S12: BRIDGEcereal visualization of major haplotypes for DTA slope candidate genes and associated phenotype estimates among the NAM founders. (A) A small insertion is present upstream of *conz1* but is not significantly associated with a change in slope (B97 group contains B97, CML322, CML333, Ki11, and MS71; B73 group contains B73, CML103, CML228, CML247, CML277, CML52, CML69, HP301, Il14H, Ki3, Ky21, M162W, M37W, Mo18W, NC350, NC358, Oh43, Oh7B, P39, Tx303, and Tzi8). (B) An insertion within the second exon of *cry3* is significantly associated with a steeper DTA slope (B73 group contains B73, HP301,

232    II14H, Oh7B, Oh43, and P39; B97 group contains B97, CML103, CML228, CML247, CML277,  
233    CML322, CML333, CML52, CML69, Ki11, Ki3, Ky21, M162W, M37W, Mo18W, MS71,  
234    NC350, NC358, Tx303, and Tzi8)  
235  
236

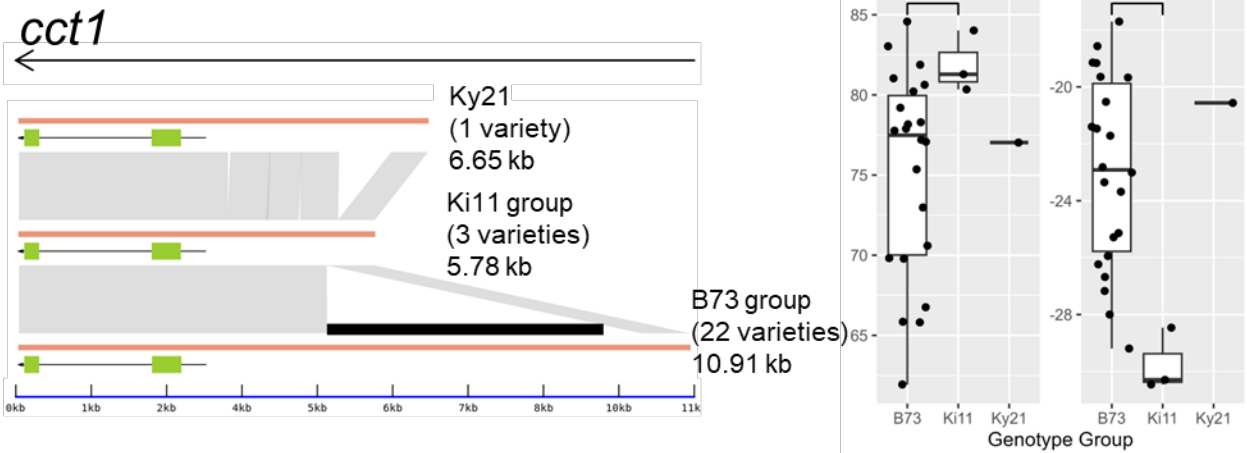

237

238 Fig. S13: BRIDGEcereal visualization of major haplotypes for *cct1*, the selected candidate gene  
 239 identified for both DTA slope and intercept, and associated phenotype estimates among the  
 240 NAM founders. The CACTA-like insertion identified upstream of *cct1* in CML228, CML277,  
 241 and Ki11 (Ki11 group) is a known allele that reduces *cct1* expression and thereby reduces  
 242 flowering time (DTA intercept). Here, this allele was also significantly associated with a steeper  
 243 DTA slope. In addition, a potential weak allele was identified in Ky21 (single member of Ky21  
 244 group). B73 group contains B73, B97, CML103, CML247, CML322, CML333, CML52,  
 245 CML69, HP301, Il14H, Ki3, M162W, M37W, Mo18W, MS71, NC350, NC358, Oh43, Oh7B,  
 246 P39, Tx303, and Tzi8.

247

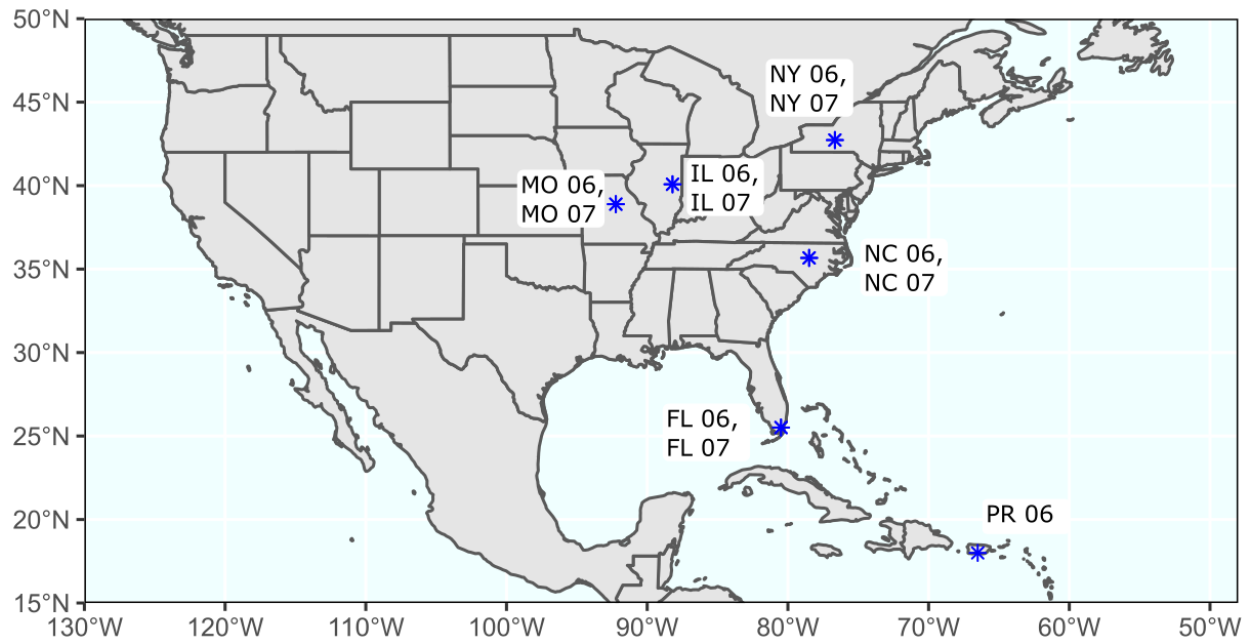

Fig. S14: Study environments map. Data was collected at 6 locations (blue asterisks) over two years. Environment names consist of the two-letter state abbreviation and the last two digits of the year (e.g., MO06 is Missouri 2006).

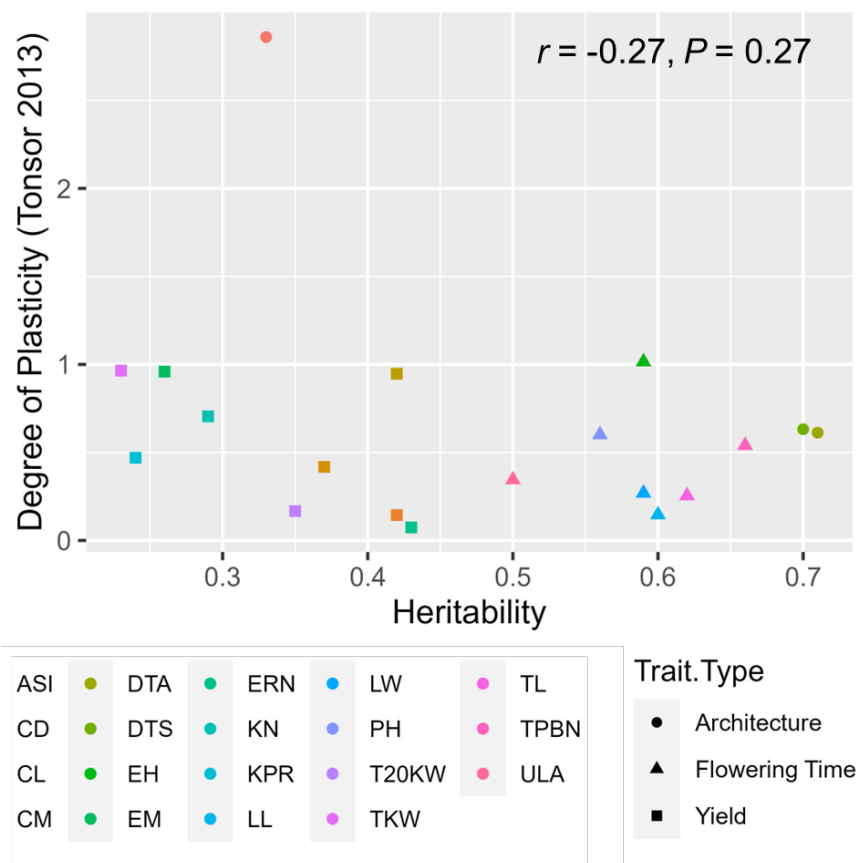

Fig. S15: Heritability ( $h_p^2$ ) and degree of plasticity (calculated per Tonsor et al. 2013) are not significantly correlated in the maize NAM.

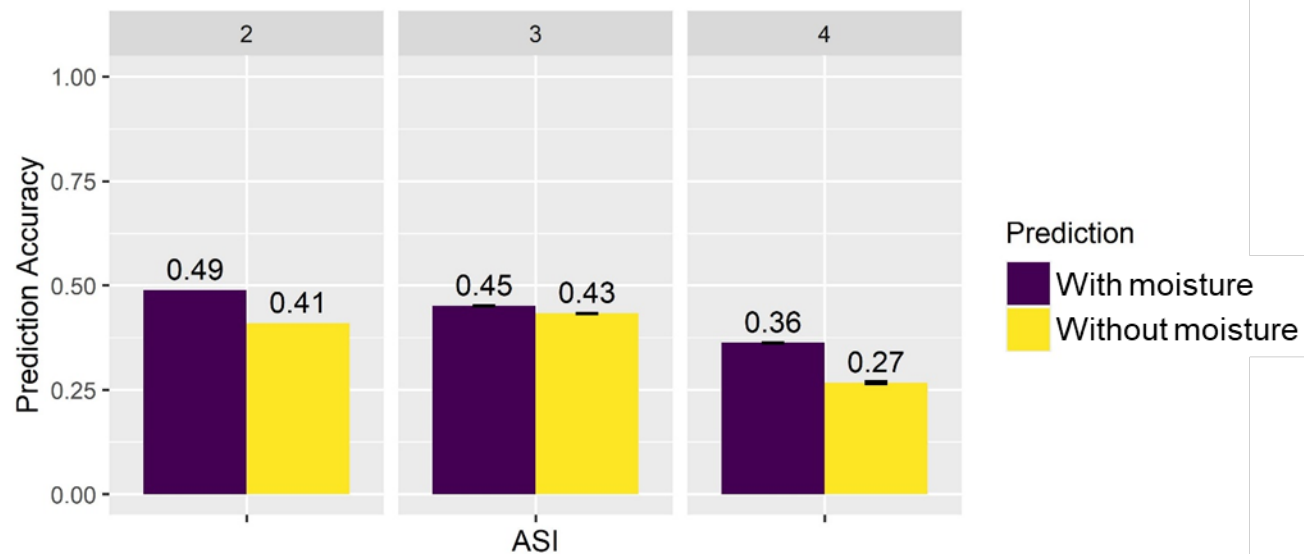

Fig. S16: Prediction accuracy for Anthesis-Silking Interval (ASI) with and without moisture variables. When including variables involving moisture (precip, PET, and water balance) in the CERIS search space (purple), prediction accuracy improved significantly for ASI. Error bars show standard error of prediction accuracy based on 30 replicates with and 5 replicates without moisture variables.



## Supplemental Tables

265 Table S1: List of traits. Abbreviations, full names, types, number of environments measured in (#  
 266 Envs), measurement time, and search windows for all nineteen traits examined in this study.  
 267 Measurement time indicates the time during the growing season at which this trait was measured,  
 268 and search window indicates the range of days after planting that were searched by CERIS for  
 269 this trait to ensure that no prediction was based on a window after the trait had been measured.

| <b>Trait Abbreviation</b> | <b>Trait Name</b>         | <b>Trait Type</b>  | <b># Envs</b> | <b>Measurement Time</b> | <b>Search Windows</b> |
|---------------------------|---------------------------|--------------------|---------------|-------------------------|-----------------------|
| <b>ASI</b>                | Anthesis-Silking Interval | Flowering Time     | 11            | Flowering Time          | 1 – 46                |
| <b>CD</b>                 | Cob Diameter              | Yield              | 6             | Harvest                 | 1 – 106               |
| <b>CL</b>                 | Cob Length                | Yield              | 6             | Harvest                 | 1 – 106               |
| <b>CM</b>                 | Cob Mass                  | Yield              | 6             | Harvest                 | 1 – 106               |
| <b>DTA</b>                | Days to Anthesis          | Flowering Time     | 11            | Flowering Time          | 1 – 46                |
| <b>DTS</b>                | Days to Silking           | Flowering Time     | 11            | Flowering Time          | 1 – 46                |
| <b>EH</b>                 | Ear Height                | Plant Architecture | 11            | Flowering Time          | 1 – 46                |
| <b>EM</b>                 | Ear Mass                  | Yield              | 6             | Harvest                 | 1 – 106               |
| <b>ERN</b>                | Ear Row Number            | Yield              | 6             | Harvest                 | 1 – 106               |
| <b>KN</b>                 | Kernel Number             | Yield              | 5             | Harvest                 | 1 – 106               |
| <b>KPR</b>                | Kernels per Row           | Yield              | 6             | Harvest                 | 1 – 106               |
| <b>LL</b>                 | Leaf Length               | Plant Architecture | 9             | Flowering Time          | 1 – 46                |
| <b>LW</b>                 | Leaf Width                | Plant Architecture | 9             | Flowering Time          | 1 – 46                |
| <b>PH</b>                 | Plant Height              | Plant Architecture | 11            | Flowering Time          | 1 – 46                |
| <b>T20KW</b>              | Weight of 20 Kernels      | Yield              | 5             | Harvest                 | 1 – 106               |
| <b>TKW</b>                | Total Kernel Weight       | Yield              | 6             | Harvest                 | 1 – 106               |
| <b>TL</b>                 | Tassel Length             | Plant Architecture | 8             | Flowering Time          | 1 – 46                |
| <b>TPBN</b>               | Tassel Branch Number      | Plant Architecture | 8             | Flowering Time          | 1 – 46                |
| <b>ULA</b>                | Upper Leaf Angle          | Plant Architecture | 9             | Flowering Time          | 1 – 46                |

Table S2: CERIS-chosen environmental indices. Environmental indices identified by CERIS for each trait using all available data. For each trait, the environmental index consists of a window and environmental variable (env.variable). The window's start and end are presented as days after planting (DAP). The correlation between the chosen environmental index (EI) and the environmental mean (EM) is shown as  $r_{EI,EM}$ .

| <b>Trait Abbreviation</b> | <b>Start (DAP)</b> | <b>End (DAP)</b> | <b>Env. Variable</b> | <b><math>r_{EI,EM}</math></b> |
|---------------------------|--------------------|------------------|----------------------|-------------------------------|
| <b>ASI</b>                | 7                  | 18               | PRECIP               | -0.8773                       |
| <b>CD</b>                 | 6                  | 38               | PET                  | -0.9981                       |
| <b>CL</b>                 | 72                 | 81               | PTD1                 | 0.9930                        |
| <b>CM</b>                 | 78                 | 85               | PTD1                 | 0.9998                        |
| <b>DTA</b>                | 31                 | 39               | PTR                  | -0.9964                       |
| <b>DTS</b>                | 31                 | 39               | PTR                  | -0.9964                       |
| <b>EH</b>                 | 26                 | 41               | PET                  | 0.9201                        |
| <b>EM</b>                 | 98                 | 105              | PTD1                 | 0.9988                        |
| <b>ERN</b>                | 90                 | 96               | DTR                  | 0.9822                        |
| <b>KN</b>                 | 97                 | 103              | PTD1                 | 0.9987                        |
| <b>KPR</b>                | 92                 | 103              | PTS                  | 0.9879                        |
| <b>LL</b>                 | 16                 | 40               | PRECIP               | 0.9645                        |
| <b>LW</b>                 | 23                 | 38               | PRECIP               | 0.8233                        |
| <b>PH</b>                 | 34                 | 40               | PET                  | 0.8889                        |
| <b>T20KW</b>              | 40                 | 73               | GDD                  | 0.9989                        |
| <b>TKW</b>                | 93                 | 102              | PET                  | 0.9991                        |
| <b>TL</b>                 | 32                 | 41               | PTD2                 | -0.8851                       |
| <b>TPBN</b>               | 30                 | 43               | PET                  | 0.8772                        |
| <b>ULA</b>                | 7                  | 38               | PRECIP               | 0.7363                        |

278 Table S3: Significant markers. Contains markers detected as significant by GWAS for each trait  
279 (slope and intercept) using a SimpleM threshold ( $\alpha = 0.05$ ). The first three columns contain  
280 chromosome, base pair location, and name for each significant marker. Subsequent columns are  
281 traits. A blank (NA) cell indicates that the marker was not detected for that trait, while numbers  
282 indicate  $P$  values for significant markers.

283

284 Note: Table S3 is attached as “Supplemental\_Table\_S3.csv”

285

286 Table S4: Candidate genes. Contains candidate genes detected by GWAS for each trait (slope  
287 and intercept) using a 20kb window around each significant marker. The first column contains  
288 all gene names from Zm-B73-REFERENCE-NAM-5.0 which were significant for at least one  
289 trait and the first row contains trait names. A “1” in a cell means that that gene was detected as a  
290 candidate gene for that trait, and a “0” means that it was not.

291

292 Note: Table S4 is attached as “Supplemental\_Table\_S4.csv”

293

294 Table S5: Enriched GO terms. Cells contain g:SCS multiple testing correction adjusted  $p$  values;  
295 cells with significant values are shaded gray and marked with an asterisk. Candidate genes  
296 within 20kb of significant markers from slope and intercept GWAS were analyzed for GO term  
297 enrichment. This analysis was conducted for the combined gene lists from all traits as well as  
298 within trait groups (Flowering Time, Yield, and Plant Architecture).

| GO Term Name                                                                                      | GO Term ID | All Traits |          | Flowering Time |          | Plant Architecture |         | Yield     |         |
|---------------------------------------------------------------------------------------------------|------------|------------|----------|----------------|----------|--------------------|---------|-----------|---------|
|                                                                                                   |            | Intercept  | Slope    | Intercept      | Slope    | Intercept          | Slope   | Intercept | Slope   |
| Ubiquinol:oxygen oxidoreductase activity                                                          | GO:0102721 | *0.00004   | 1.00000  | 1.00000        | 1.00000  | *0.00016           | 1.00000 | 1.00000   | 1.00000 |
| Alternative oxidase activity                                                                      | GO:0009916 | *0.00004   | 1.00000  | 1.00000        | 1.00000  | *0.00016           | 1.00000 | 1.00000   | 1.00000 |
| Oxidoreductase activity, acting on diphenols and related substances as donors, oxygen as acceptor | GO:0016682 | *0.00203   | 1.00000  | 1.00000        | 1.00000  | *0.00069           | 1.00000 | 1.00000   | 1.00000 |
| Oxidoreductase activity, acting on diphenols and related substances as donors                     | GO:0016679 | *0.02732   | 1.00000  | 1.00000        | 1.00000  | *0.00665           | 1.00000 | 1.00000   | 1.00000 |
| RNA-directed 5'-3' RNA polymerase activity                                                        | GO:0003968 | 1.00000    | 0.09460  | 1.00000        | *0.03676 | 1.00000            | 1.00000 | 1.00000   | 1.00000 |
| ATPase-coupled intramembrane lipid transporter activity                                           | GO:0140326 | 1.00000    | *0.04653 | 1.00000        | 0.23530  | 1.00000            | 1.00000 | 1.00000   | 1.00000 |
| Alternative respiration                                                                           | GO:0010230 | *0.00089   | 1.00000  | 1.00000        | 1.00000  | *0.00214           | 1.00000 | 1.00000   | 1.00000 |
| Detoxification                                                                                    | GO:0098754 | 1.00000    | 0.47270  | 1.00000        | *0.03830 | 1.00000            | 1.00000 | 1.00000   | 1.00000 |
| Response to toxic substance                                                                       | GO:0009636 | 1.00000    | 0.56234  | 1.00000        | *0.04288 | 1.00000            | 1.00000 | 1.00000   | 1.00000 |
| Cellular oxidant detoxification                                                                   | GO:0098869 | 1.00000    | 0.45173  | 1.00000        | *0.04711 | 1.00000            | 1.00000 | 1.00000   | 1.00000 |
| Plant hormone signal transduction                                                                 | KEGG:04075 | *0.02339   | 1.00000  | 1.00000        | 1.00000  | *0.02313           | 1.00000 | 1.00000   | 1.00000 |
| Biosynthesis of secondary metabolites                                                             | KEGG:01110 | 1.00000    | *0.02882 | 1.00000        | 0.23211  | 1.00000            | 1.00000 | 1.00000   | 1.00000 |

300 Table S6: Within-environment heritability. Heritability on an individual plot basis ( $h_p^2$ ) for each  
301 trait in each environment. Blank cells indicate environments in which the specified trait was not  
302 measured.

|              | <b>IL06</b> | <b>FL06</b> | <b>MO06</b> | <b>NC06</b> | <b>NY06</b> | <b>PR06</b> | <b>IL07</b> | <b>FL07</b> | <b>MO07</b> | <b>NC07</b> | <b>NY07</b> |
|--------------|-------------|-------------|-------------|-------------|-------------|-------------|-------------|-------------|-------------|-------------|-------------|
| <b>ASI</b>   | 0.24        | 0.44        | 0.20        | 0.55        | 0.42        | 0.43        | 0.25        | 0.63        | 0.67        | 0.59        | 0.34        |
| <b>CD</b>    | 0.39        | 0.53        |             | 0.64        | 0.60        | 0.59        |             |             |             | 0.77        |             |
| <b>CL</b>    | 0.45        | 0.40        |             | 0.62        | 0.56        | 0.53        |             |             |             | 0.73        |             |
| <b>CM</b>    | 0.66        | 0.46        |             | 0.64        | 0.69        | 0.58        |             |             |             | 0.77        |             |
| <b>DTA</b>   | 0.86        | 0.79        | 0.81        | 0.86        | 0.85        | 0.71        | 0.87        | 0.88        | 0.93        | 0.92        | 0.70        |
| <b>DTS</b>   | 0.87        | 0.74        | 0.83        | 0.85        | 0.69        | 0.77        | 0.84        | 0.83        | 0.92        | 0.91        | 0.66        |
| <b>EH</b>    | 0.76        | 0.68        | 0.60        | 0.79        | 0.66        | 0.67        | 0.75        | 0.73        | 0.77        | 0.77        | 0.77        |
| <b>EM</b>    | 0.55        | 0.42        |             | 0.58        | 0.61        | 0.55        |             |             |             | 0.81        |             |
| <b>ERN</b>   | 0.64        | 0.60        |             | 0.69        | 0.57        | 0.58        |             |             |             | 0.77        |             |
| <b>KN</b>    |             | 0.54        |             | 0.58        | 0.69        | 0.59        |             |             |             | 0.84        |             |
| <b>KPR</b>   | 0.22        | 0.34        |             | 0.53        | 0.63        | 0.46        |             |             |             | 0.72        |             |
| <b>LL</b>    | 0.80        | 0.71        | 0.65        | 0.71        | 0.67        | 0.65        | 0.73        |             |             | 0.65        | 0.59        |
| <b>LW</b>    | 0.65        | 0.66        | 0.59        | 0.68        | 0.54        | 0.69        | 0.71        |             |             | 0.75        | 0.62        |
| <b>PH</b>    | 0.83        | 0.71        | 0.65        | 0.83        | 0.58        | 0.70        | 0.76        | 0.69        | 0.83        | 0.77        | 0.68        |
| <b>T20KW</b> |             | 0.39        |             | 0.61        | 0.61        | 0.65        |             |             |             | 0.76        |             |
| <b>TKW</b>   | 0.41        | 0.42        |             | 0.56        | 0.63        | 0.54        |             |             |             | 0.81        |             |
| <b>TL</b>    | 0.77        | 0.72        | 0.66        | 0.78        | 0.70        | 0.71        | 0.76        |             |             |             | 0.73        |
| <b>TPBN</b>  | 0.73        | 0.62        | 0.71        | 0.72        | 0.63        | 0.75        | 0.70        |             |             |             | 0.67        |
| <b>ULA</b>   | 0.60        | 0.62        | 0.39        | 0.68        | 0.62        | 0.45        | 0.63        |             |             | 0.78        | 0.58        |

303
